# Supplementary material for: A 3D-Printed Sole Design Bioinspired by Cat Paw Pad and Triply Periodic Minimal Surface for Improving Paratrooper Landing Protection
Source: MDPI journal article supplement (doi:10.3390/polym14163270), 2022-08-11
Supplement: s1 [file s1]

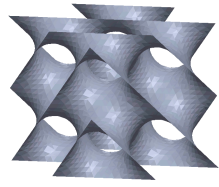

**(a) Diamond**

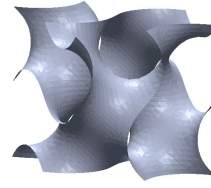

**(b) Gyroid**

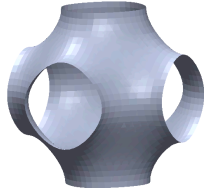

**(c) Primitive**

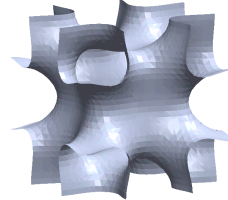

**(d) IWP**

**Figure S1.** Unit cell of four typical TPMS topologies.

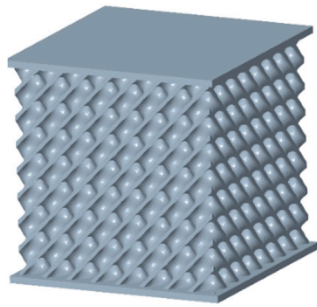

**(a) Diamond**

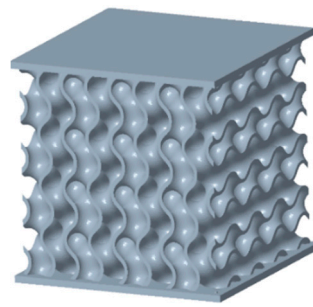

**(b) Gyroid**

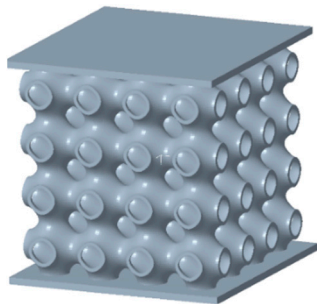

**(c) Primitive**

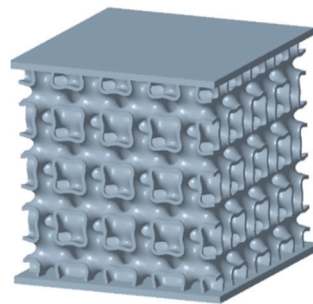

**(d) IWP**

**Figure S2.** Geometry model of cubic specimens with  $4 \times 4 \times 4$  cell numbers for four typical TPMS.

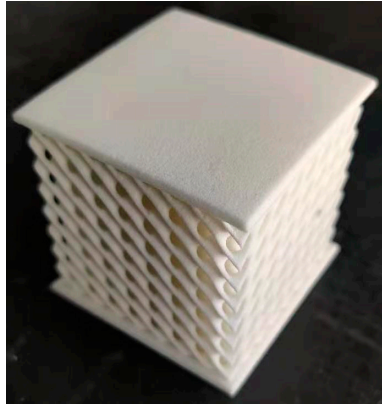

**(a) Diamond**

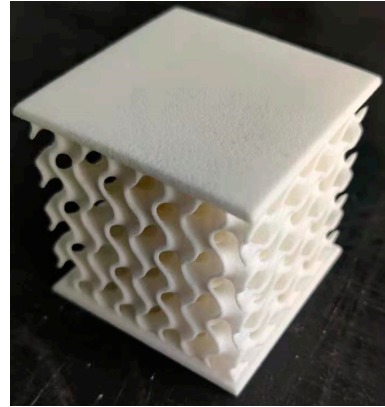

**(b) Gyroid**

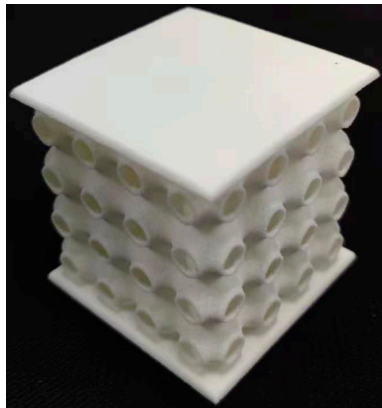

**(c) Primitive**

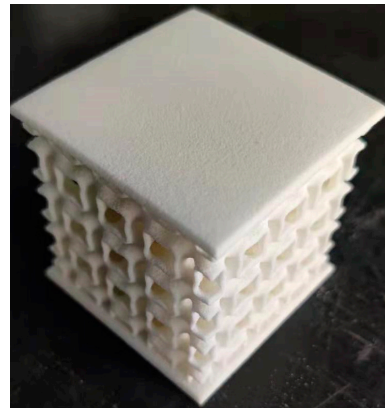

**(d) IWP**

**Figure S3.** Cubic specimens of TPMS fabricated by SLS technique.

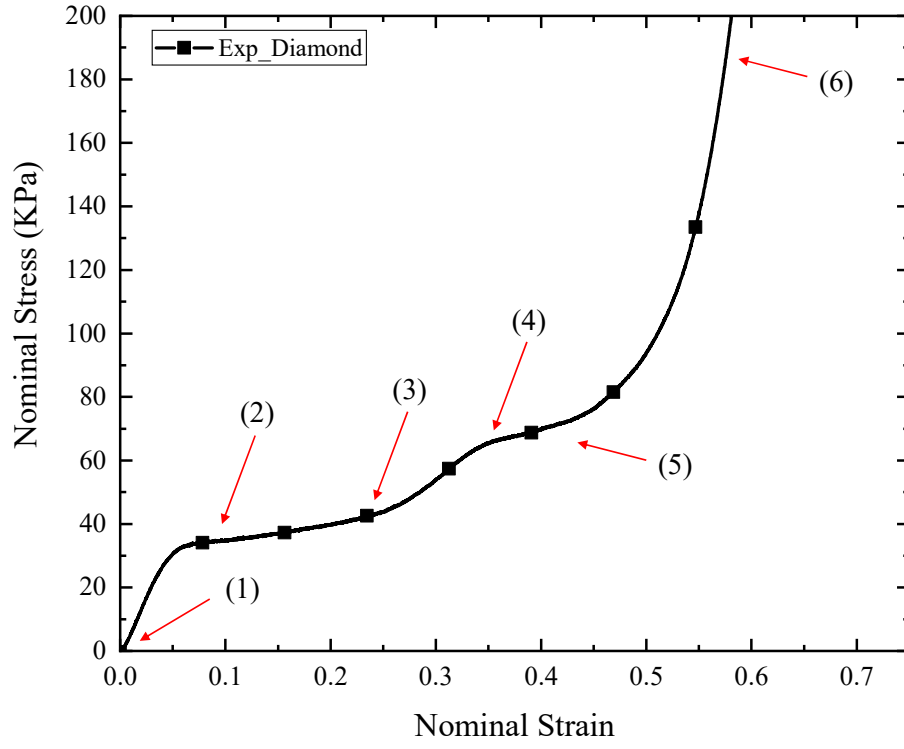

(a)

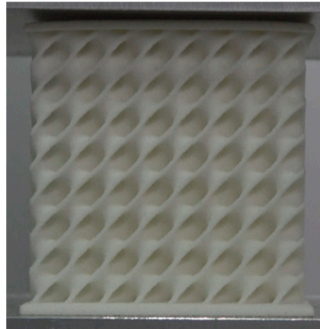

(1)

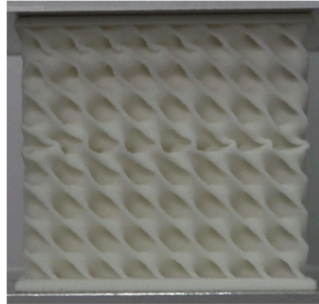

(2)

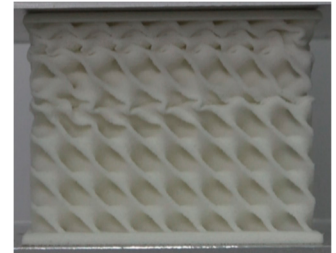

(3)

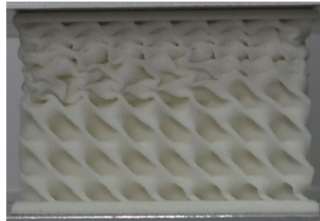

(4)

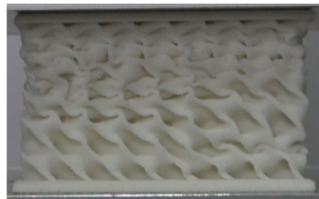

(5)

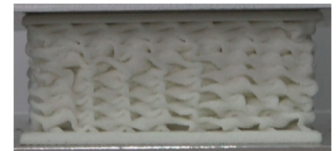

(6)

(b)

**Figure S4.** Results of quasi-static compression tests of Diamond structure: (a) Nominal stress-nominal strain curves; (b) Deformation process.

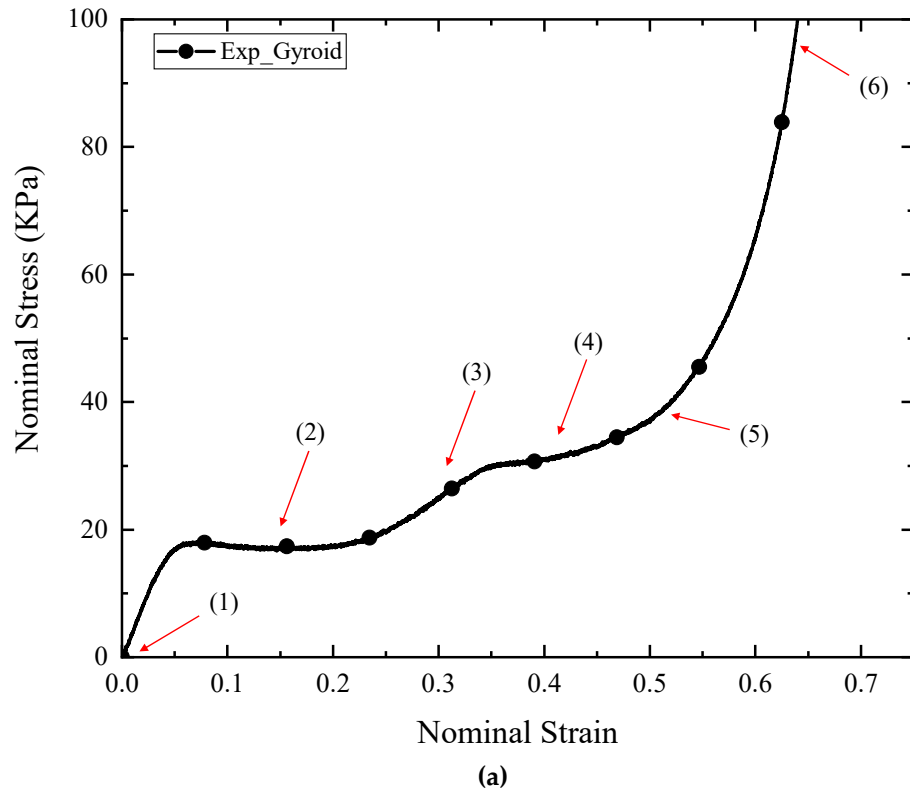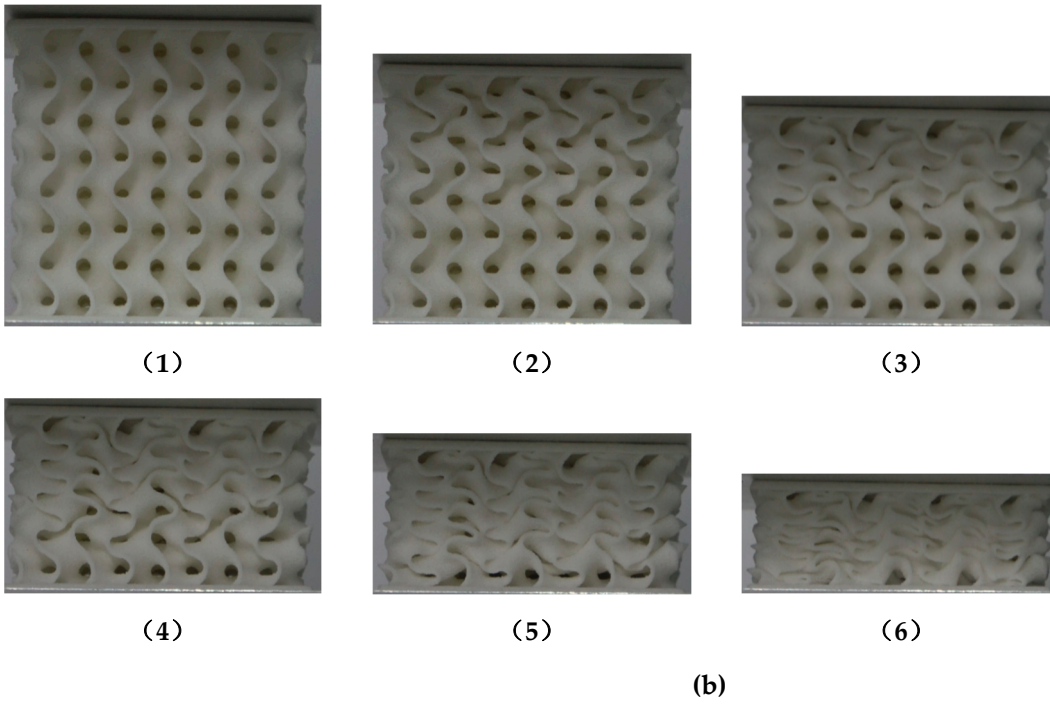

**Figure S5.** Results of quasi-static compression tests of Gyroid structure: (a) Nominal stress-nominal strain curves; (b) Deformation process.

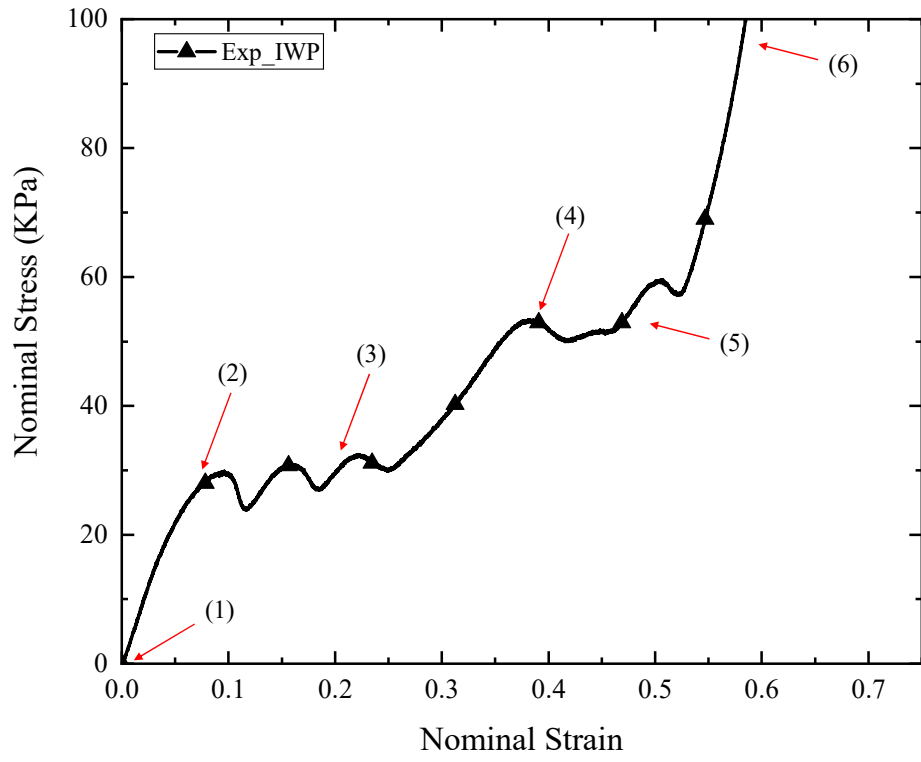

(a)

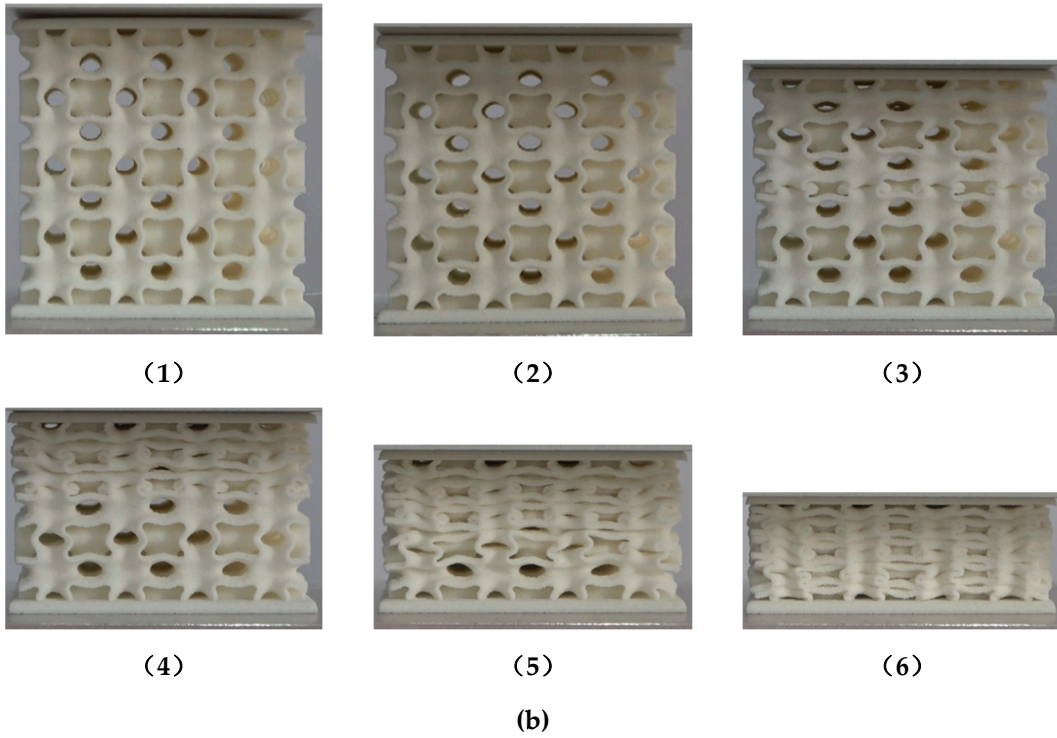

(b)

**Figure S6.** Results of quasi-static compression tests of IWP structure: (a) Nominal stress-nominal strain curves; (b) Deformation process.



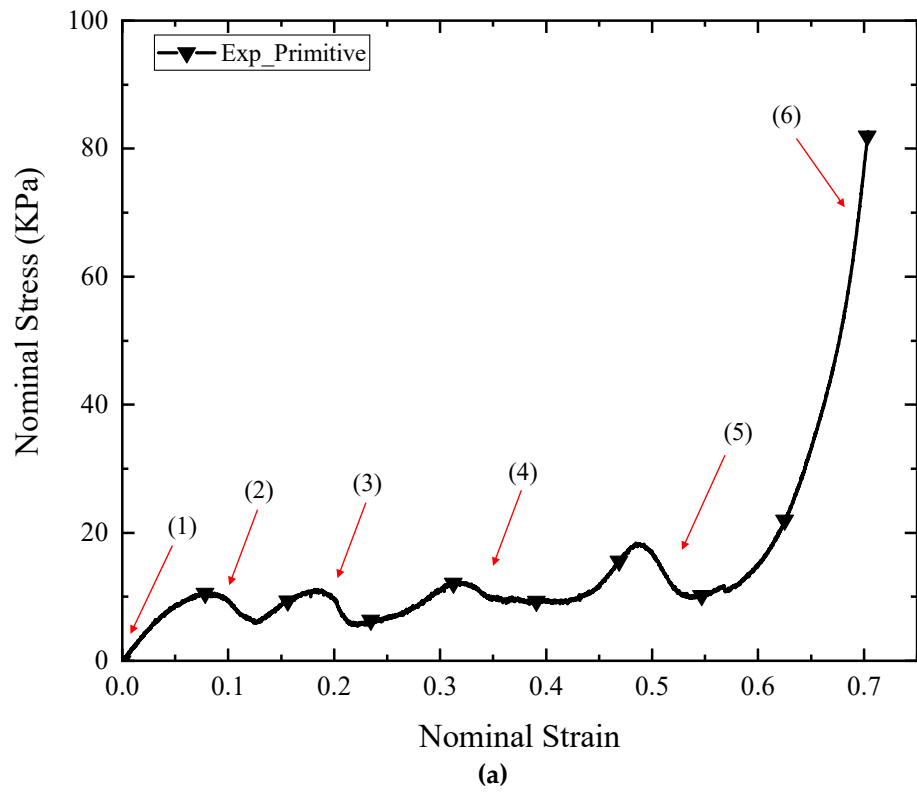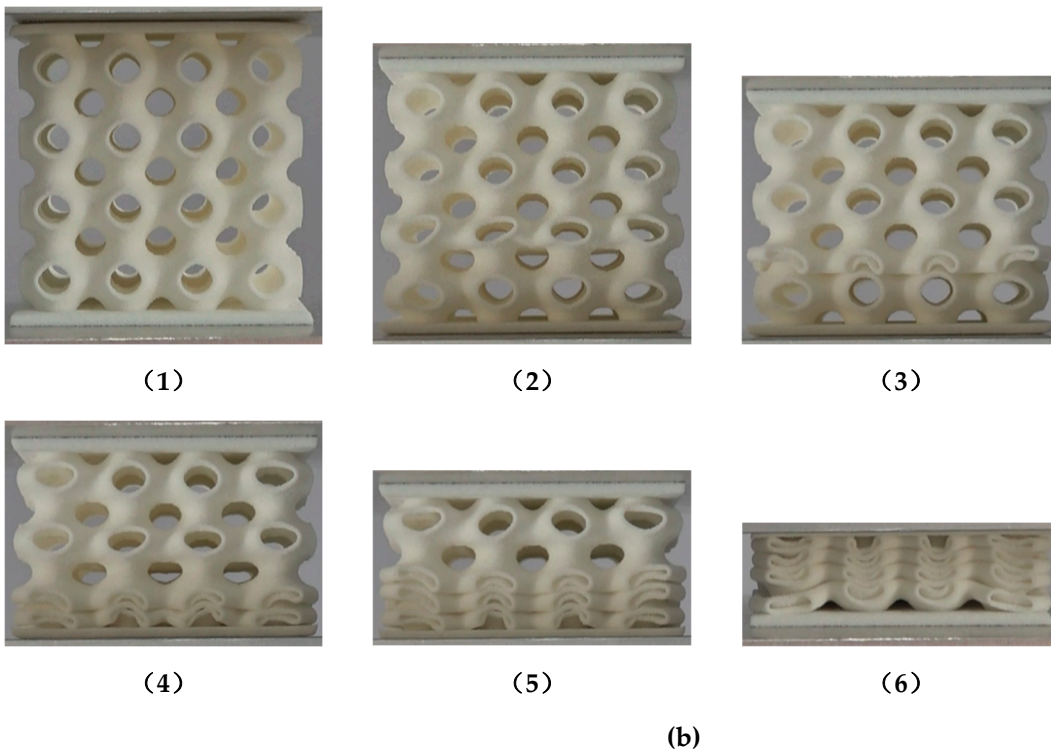

**Figure S7.** Results of quasi-static compression tests of IWP structure: (a) Nominal stress-nominal strain curves; (b) Deformation process.

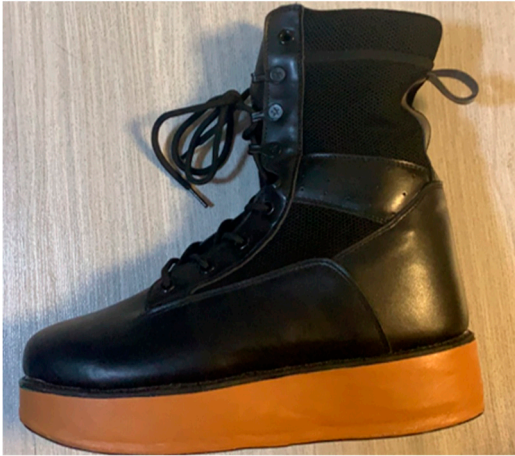

(a)

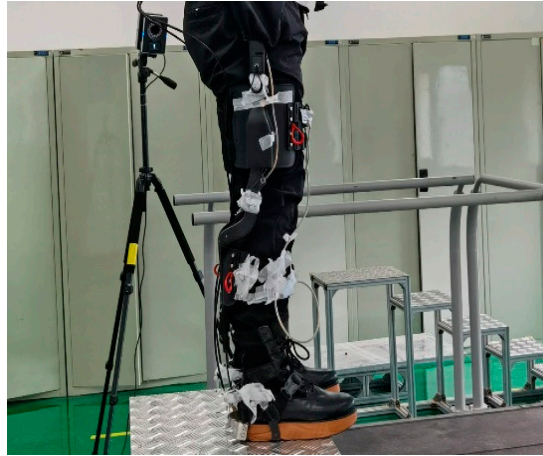

(b)

**Figure S8.** Fabricated paratrooper boots with the design cushion sole: (a) Fabricated paratrooper boots; (b) Fabricated paratrooper boots and exoskeletons on lower extremities for jumping.
